# Supplementary material for: Supporting Peer Support Workers and Their Supervisors: Cluster-Randomized Trial Evaluating a Systems-Level Intervention
Source: Atypon-hosted journal article supplement (doi:10.1176/appi.ps.20230112), 2024-01-11
Supplement: appi.ps.20230112.ds001.pdf [file appi.ps.20230112.ds001.pdf]

Online supplement. CONSORT flow diagram of site selection and allocation.

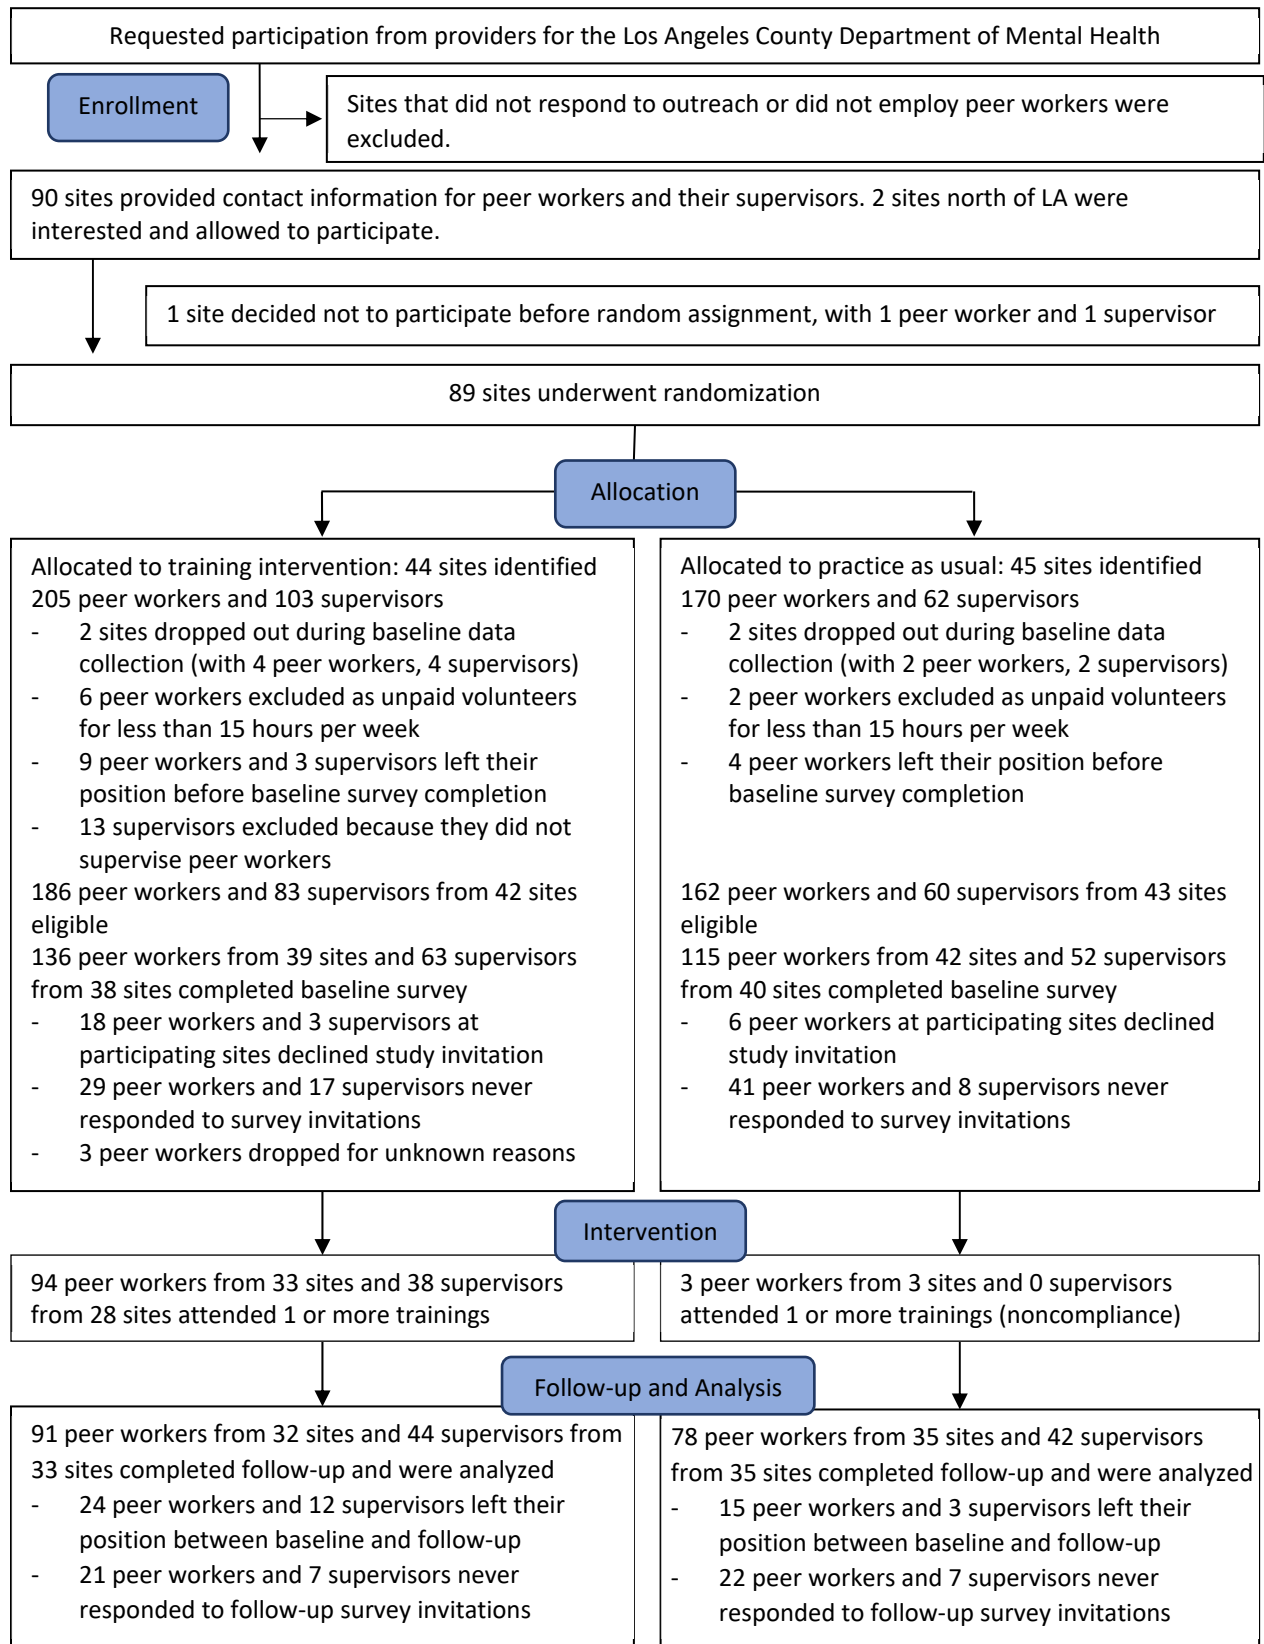

| <b>Site outcomes</b>                                                                                           |                                                                                                                                                                                                                       |
|----------------------------------------------------------------------------------------------------------------|-----------------------------------------------------------------------------------------------------------------------------------------------------------------------------------------------------------------------|
| <i>Peer supportive organizational climate</i> – primary outcome, 6 items, 7-point Likert scale, $\alpha = .94$ |                                                                                                                                                                                                                       |
| Definition                                                                                                     | Peer worker-reported organizational inclusion and support for peer workers                                                                                                                                            |
| Source                                                                                                         | Perceived Organizational ‘Lived Experience’ Climate scale <sup>1</sup>                                                                                                                                                |
| Item ex.                                                                                                       | Administrators regularly organize events and activities to promote peer inclusion and involvement.                                                                                                                    |
| <i>Recovery orientation of services</i> – secondary outcome, 4 items, 7-point Likert scale, $\alpha = .96$     |                                                                                                                                                                                                                       |
| Definition                                                                                                     | Peer worker perceptions of the extent to which providers at their organization treated service users with respect, helped them feel valued, communicated honestly, and provided equitable resolution of disagreements |
| Source                                                                                                         | Organizational Culture scale from Recovery Orientation of Services Evaluation. <sup>2</sup>                                                                                                                           |
| Item ex.                                                                                                       | Service users feel respected by service providers.                                                                                                                                                                    |
| <b>Supervisor outcomes</b>                                                                                     |                                                                                                                                                                                                                       |
| <i>Mental health stigma</i> – primary outcome, 15 items, 5-point Likert scale, $\alpha = .74$                  |                                                                                                                                                                                                                       |
| Definition                                                                                                     | Supervisor reported negative attitudes towards people with mental health problems including a desire to maintain distance, low possibility of recovery, and dangerousness                                             |
| Source                                                                                                         | Stigma scale <sup>3</sup>                                                                                                                                                                                             |
| Item ex.                                                                                                       | I would feel unsafe around a person with a mental health problem.                                                                                                                                                     |
| <i>Perceived utility of peer support</i> – secondary outcome, 3 items, 11-point Likert scale, $\alpha = .84$   |                                                                                                                                                                                                                       |
| Definition                                                                                                     | Attitudes about the utility of peer support                                                                                                                                                                           |
| Source                                                                                                         | modified from a 12-step group attitudes scale <sup>4</sup>                                                                                                                                                            |
| Item ex.                                                                                                       | In your professional judgement, how helpful is peer support?                                                                                                                                                          |
| <i>Supervisor job satisfaction</i> – secondary outcome, 1 item, 5-point Likert scale                           |                                                                                                                                                                                                                       |
| Definition                                                                                                     | Self-reported job satisfaction                                                                                                                                                                                        |
| Source                                                                                                         | Individual Work Performance Questionnaire. <sup>5</sup>                                                                                                                                                               |
| Item ex.                                                                                                       | Overall, how satisfied are you with your job?                                                                                                                                                                         |
| <i>Supervision quality</i> – secondary outcome, 11 items, 7-point Likert scale, $\alpha = .97$                 |                                                                                                                                                                                                                       |
| Definition                                                                                                     | Peer perceptions of supervision effectiveness, supportiveness, and satisfaction                                                                                                                                       |
| Source                                                                                                         | Supervision Evaluation and Supervisory Competence Scale <sup>6</sup>                                                                                                                                                  |
| Item ex.                                                                                                       | Overall, supervision significantly enhanced my competence as a practitioner and professional.                                                                                                                         |
| <b>Proximal peer worker outcomes</b>                                                                           |                                                                                                                                                                                                                       |
| <i>Supervisor/peer worker relationship</i> – secondary outcome, 12 items, 7-point Likert scale, $\alpha = .95$ |                                                                                                                                                                                                                       |
| Definition                                                                                                     | Supervisor-reported relationship quality and emotional bond with peer worker                                                                                                                                          |
| Source                                                                                                         | Safe base subscale of the Supervisory Relationship Measure <sup>7</sup>                                                                                                                                               |
| Item ex.                                                                                                       | [Peer worker name] and I have a good professional relationship.                                                                                                                                                       |
| <i>Discrimination experience</i> – secondary outcome, 5 items, 4-point Likert scale, $\alpha = .96$            |                                                                                                                                                                                                                       |
| Definition                                                                                                     | Experience with discrimination related to mental health                                                                                                                                                               |
| Source                                                                                                         | Perceived Discrimination subscale of Internalized Stigma of Mental Illness scale <sup>8</sup>                                                                                                                         |
| Item ex.                                                                                                       | People discriminate against me because I have a mental illness.                                                                                                                                                       |

|                                                                                                    |                                                                                                                                                                |
|----------------------------------------------------------------------------------------------------|----------------------------------------------------------------------------------------------------------------------------------------------------------------|
| <i>Use of peer support</i> – secondary outcome, 9 items, 8-point Likert scale, $\alpha = .86$      |                                                                                                                                                                |
| Definition                                                                                         | Time spent on peer support activities (e.g. peer mentoring, referring to self-help groups), relative to other tasks such as case management and clerical tasks |
| Source                                                                                             | Created by authors                                                                                                                                             |
| Item ex.                                                                                           | When working, how much time do you spend on the following activities in a typical week...Case management.                                                      |
| <b>Distal peer worker outcomes</b>                                                                 |                                                                                                                                                                |
| <i>Recovery</i> – primary outcome, 24 items, 5-point Likert scale, $\alpha = .94$                  |                                                                                                                                                                |
| Definition                                                                                         | (a) personal confidence and hope, (b) willingness to ask for help, (c) goal and success orientation, (d) reliance on other, and (e) not dominated by symptoms  |
| Source                                                                                             | Recovery Assessment Scale-Short Form <sup>9</sup>                                                                                                              |
| Item ex.                                                                                           | I'm hopeful about my future.                                                                                                                                   |
| <i>Work contributions</i> – secondary outcome, 12 items, 7-point Likert scale, $\alpha = .92$      |                                                                                                                                                                |
| Definition                                                                                         | Peer worker productivity and work quality, as perceived by the supervisor                                                                                      |
| Source                                                                                             | Trainee contribution subscale of the Supervisory Relationship Measure <sup>7</sup>                                                                             |
| Item ex.                                                                                           | [Peer worker name] is able to hold an appropriate work load.                                                                                                   |
| <i>Peer worker job satisfaction</i> – secondary outcome, 1 item, 5-point Likert scale              |                                                                                                                                                                |
| Definition                                                                                         | Self-reported job satisfaction                                                                                                                                 |
| Source                                                                                             | Individual Work Performance Questionnaire <sup>5</sup>                                                                                                         |
| Item ex.                                                                                           | Overall, how satisfied are you with your job?                                                                                                                  |
| <i>Work-related burnout</i> – secondary outcome, 7 items, 5-point Likert scale, $\alpha = .85$     |                                                                                                                                                                |
| Definition                                                                                         | Sense of exhaustion and low energy because of work                                                                                                             |
| Source                                                                                             | Copenhagen Burnout Inventory <sup>10</sup>                                                                                                                     |
| Item ex.                                                                                           | Are you exhausted in the morning at the thought of another day at work?                                                                                        |
| <i>Sick leave and disability days</i> – secondary outcome, 1 item                                  |                                                                                                                                                                |
| Definition                                                                                         | Peer worker reported number of sick leave or disability days in past 6 months                                                                                  |
| Source                                                                                             | Based on self-reported sick leave research <sup>11</sup>                                                                                                       |
| Item ex.                                                                                           | How many sick leave or disability days have you had within the last 6 months?                                                                                  |
| <i>Brief symptom inventory</i> – secondary outcome, 27 items, 4-point Likert scale, $\alpha = .97$ |                                                                                                                                                                |
| Definition                                                                                         | Assessed anxiety, depression, and other mental health symptoms                                                                                                 |
| Source                                                                                             | Subscales for Anxiety, Obsession-Compulsion, Hostility, Depression, and Interpersonal Sensitivity of the Brief Symptom Inventory. <sup>12</sup>                |
| Item ex.                                                                                           | Feeling fearful.                                                                                                                                               |
| <i>Stress</i> – secondary outcome, 6 items, 5-point Likert scale, $\alpha = .92$                   |                                                                                                                                                                |
| Definition                                                                                         | Global self-reported stress                                                                                                                                    |
| Source                                                                                             | Perceived Stress Scale <sup>13</sup>                                                                                                                           |
| Item ex.                                                                                           | In the past 30 days how often have you... Felt that you were unable to control the important things in your life?                                              |
| <i>Social Support</i> – secondary outcome, 3 items, 6-point Likert scale, $\alpha = .81$           |                                                                                                                                                                |
| Definition                                                                                         | Satisfaction with social support                                                                                                                               |
| Source                                                                                             | Social Support Questionnaire <sup>14</sup>                                                                                                                     |
| Item ex.                                                                                           | How satisfied are you with the support you have when you need help?                                                                                            |

1. Jones N, Teague GB, Wolf J, Rosen C. Organizational climate and support among peer specialists working in peer-run, hybrid and conventional mental health settings. *Adm Policy Ment Health*. 2020;47(1):150-167.
2. Campbell-Orde T, Chamberlin J, Carpenter J, Leff HS. *Measuring the promise: A compendium of recovery measures (Vol. II)*. Cambridge, MA: Human Services Research Institute;2005.
3. Quinn N, Smith M, Fleming S, Shulman A, Knifton L. Self and others: The differential impact of an anti-stigma programme. *Stigma Res Action*. 2011;1(1):36-43.
4. Laudet AB, White WL. An exploratory investigation of the association between clinicians' attitudes toward twelve-step groups and referral rates. *Alcohol Treat Q*. 2005;23:31-45.
5. Koopmans L, Coffeng JK, Bernaards CM, et al. Responsiveness of the individual work performance questionnaire. *BMC Public Health*. 2014;14:513.
6. Gonsalvez C, Hamid G, Savage N, Livni D. The Supervision Evaluation and Supervisory Competence Scale: Psychometric validation. *Aust Psychol*. 2017;52:94-103.
7. Pearce N, Beinart H, Clohessy S, Cooper M. Development and validation of the Supervisory Relationship Measure: A self-report questionnaire for use with supervisors. *Br J Clin Psychol*. 2013;52(3):249-268.
8. Ritsher JB, Otilingam PG, Grajales M. Internalized stigma of mental illness: Psychometric properties of a new measure. *Psychiatry Res*. 2003;121(1):31-49.
9. Corrigan PW, Phelan SM. Social support and recovery in people with serious mental illnesses. *Community Ment Health J*. 2004;40(6):513-523.
10. Kristensen TS, Borritz M, Villadsen E, Christensen KB. The Copenhagen Burnout Inventory: A new tool for the assessment of burnout. *Work Stress*. 2007;19(3):192-207.
11. Stapelfeldt CM, Jensen C, Andersen NT, Fleten N, Nielsen CV. Validation of sick leave measures: Self-reported sick leave and sickness benefit data from a Danish national register compared to multiple workplace-registered sick leave spells in a Danish municipality. *BMC Public Health*. 2012;12(1):661.
12. Derogatis LR. *BSI Brief Symptom Inventory. Administration, Scoring, and Procedures Manual* 4th ed. Minneapolis, MN: National Computer Systems; 1993.
13. Cohen S, Kamarck T, Mermelstein R. A global measure of perceived stress. *J Health Soc Behav*. 1983;24:385-396.
14. Sarason IG, Levine HM, Basham RB, Sarason BR. Assessing social support: The Social Support Questionnaire. *J Pers Soc Psychol*. 1983;44:127-139.
